# Supplementary material for: Toll-Like Receptor and miRNA-let-7e Expression Alter the Inflammatory Response in Leishmania amazonensis-Infected Macrophages
Source: Front Immunol. 2018 Nov 29;9:2792. doi: 10.3389/fimmu.2018.02792 (PMC6283264; doi:10.3389/fimmu.2018.02792)
Supplement: Table S1 — C57BL/6 (WT), MyD88−/−, TLR2−/−, and TLR4−/− murine macrophages during L. amazonensis infection. FR (Fold Regulation) represents the fold change results at a biological magnitude. Values >1.2 indicate positive regulation and values < -1.2 indicate negative regulation. [file Table_1.XLSX]

## Sheet: Sheet1
	WT						MyD88-/-						TLR2-/-						TLR4-/-
	4 h		24 h		48 h		4 h		24 h		48 h		4 h		24 h		48 h		4 h		24 h		48 h
Mature ID	FR	p-value	FR	p-value	FR	p-value	FR	p-value	FR	p-value	FR	p-value	FR	p-value	FR	p-value	FR	p-value	FR	p-value	FR	p-value	FR	p-value
mmu-let-7a-5p	1.29	0.186	1.34	0.276	1.2	0.28	1.06	0.686	1.04	0.88	1.03	0.702	-1.29	0.286	-2.31	0.0001	-1.42	0.069	-2.71	0.152	-2.36	0.264	-1.04	0.926
mmu-let-7b-5p	1.39	0.169	1.41	0.12	1.48	0.145	1.58	0.052	1.52	0.099	1.69	0.168	-1.46	0.205	-1.24	0.361	-1.43	0.234	1.01	0.747	-1.02	0.87	-1.11	0.058
mmu-let-7c-5p	1.43	0.177	1.46	0.063	1.43	0.132	1.23	0.318	1.37	0.102	1.53	0.168	-1.55	0.084	-1.28	0.339	-1.4	0.152	-1.41	0.098	1.02	0.824	-1.12	0.094
mmu-let-7d-5p	1.18	0.510	1.26	0.341	1.32	0.28	1.19	0.499	1.16	0.567	1.46	0.228	-1.55	0.292	1.45	0.764	-1.39	0.401	-2.42	0.247	-1.06	0.536	1.25	0.906
mmu-let-7e-5p	1.10	0.008	1.41	0	2.64	0.036	-1.27	0.036	-1	0.995	-1.23	0.648	-1.8	0.02	-1.35	0.108	-1.39	0.079	-1.66	0.328	-1.17	0.55	1.13	0.986
mmu-let-7f-5p	1.09	0.277	1.36	0.001	1.3	0.05	1.14	0.147	1.03	0.697	1.08	0.107	-1.52	0.216	-1.32	0.315	-1.67	0.16	-1.69	0.109	-1.25	0.393	1.3	0.481
mmu-let-7g-5p	1.06	0.246	1.23	0.002	1.14	0.044	1.03	0.479	1.03	0.487	1.14	0.16	-1.51	0.126	-1.14	0.453	-1.22	0.333	1.00	0.889	-1.02	0.854	-1.15	0.267
mmu-let-7i-5p	1.14	0.190	1.07	0.487	-1.1	0.505	-1.05	0.677	1.07	0.464	-1.14	0.204	-1.38	0.124	-1.16	0.379	-1.28	0.193	-1.18	0.279	1.08	0.361	-1.01	0.958
mmu-miR-106a-5p	-1.01	0.968	-1.56	0.16	-1.98	0.074	-1.09	0.643	-1.33	0.261	-1.5	0.24	-1.18	0.424	-1.12	0.537	-1.4	0.206	-1.03	0.864	-1.15	0.433	-1.44	0.139
mmu-miR-106b-5p	-1.14	0.654	-1.67	0.176	-1.91	0.119	-1.01	0.832	-1.32	0.298	-1.48	0.406	-1.02	0.801	-1.02	0.995	-1.11	0.622	-1.11	0.482	-1.16	0.32	-1.28	0.088
mmu-miR-1192	1.05	0.942	5.74	0.283	1.17	0.555	-1.11	0.647	1.25	0.386	1.17	0.581	1.1	0.701	1.04	0.921	-1.01	0.953	1.38	0.242	1.2	0.368	1.02	0.859
mmu-miR-126a-5p	-1.13	0.693	-1.38	0.628	-1.3	0.754	1.27	0.818	-1.22	0.455	1.12	0.711	-1.34	0.365	-1.69	0.28	-2.05	0.25	-1.96	0.03	-1.15	0.501	3.15	0.375
mmu-miR-128-3p	-1.02	0.93	-1.11	0.531	-1.08	0.58	-1.2	0.173	1.01	0.989	1.09	0.549	-1.58	0.162	-1.13	0.518	-1.41	0.233	-1.27	0.101	-1.09	0.398	-1.37	0.037
mmu-miR-130a-3p	-1.1	0.202	-1.56	0.007	1.36	0.174	2.22	0.007	1.74	0.081	2.42	0.032	-2.99	0.004	-2.9	0.02	-1.94	0.339	-2.67	0.303	-3	0.229	-1.98	0.309
mmu-miR-130b-3p	-1.26	0.688	-1.44	0.384	-1.51	0.255	-1.08	0.803	-1.14	0.531	-1.29	0.411	-1.01	0.814	-1.1	0.591	-1.3	0.395	-1.21	0.141	-1.37	0.003	-1.91	0.001
mmu-miR-135a-5p	-1.07	0.989	-1.32	0.314	-1.24	0.359	-1.42	0.249	-1.54	0.162	-1.29	0.302	-1.59	0.006	-1.02	0.947	-1.37	0.23	9.66	0.374	-1.28	0.312	-1.79	0.193
mmu-miR-140-5p	-1.09	0.778	-1.18	0.204	-1.27	0.35	-1.08	0.505	-1.1	0.433	-1.09	0.459	-1.37	0.113	-1.1	0.496	1.03	0.914	-1.1	0.314	-1.12	0.177	-1.04	0.632
mmu-miR-144-3p	-1.3	0.838	-2.72	0.439	-2.52	0.283	-1.1	0.279	-1.37	0.229	-2.01	0.236	4.16	0.274	1.71	0.365	1.31	0.358	-1.13	0.682	-6.62	0.006	-5.43	0.011
mmu-miR-155-5p	-1.15	0.435	-1.38	0.123	-1.8	0.098	-1.09	0.545	-1.66	0.057	-2.14	0.031	-1.07	0.584	-1.25	0.428	-1.87	0.21	-1.31	0.259	-1.06	0.679	1.01	0.82
mmu-miR-15a-5p	1.00	0.879	-1.54	0	-1.38	0.307	1.12	0.397	-1.17	0.093	-1.11	0.849	-1.14	0.457	-1.25	0.297	-1.42	0.17	-1.67	0.024	-1.07	0.617	-1.19	0.217
mmu-miR-15b-5p	1.31	0.302	-1.61	0.096	-1.41	0.264	1.04	0.97	-1.13	0.448	-1.21	0.351	-1.15	0.499	-1.19	0.471	-1.47	0.281	-1.1	0.412	-1.16	0.066	-1.21	0.081
mmu-miR-16-5p	1.11	0.415	1.07	0.558	1.05	0.634	1.2	0.082	1.28	0.045	1.23	0.084	-1.37	0.197	-1.11	0.532	-1.24	0.321	-1.12	0.322	-1	0.945	-1.09	0.113
mmu-miR-17-5p	-1.16	0.653	-1.46	0.227	-1.9	0.047	-1.18	0.426	-1.4	0.148	-1.47	0.186	-1.12	0.554	-1.05	0.695	-1.31	0.326	-1.23	0.069	-1.47	0.015	-1.84	0.004
mmu-miR-181a-5p	1.09	0.344	-1.33	0.307	-1.29	0.058	1.01	0.736	1.25	0.08	1.11	0.51	-2.66	0.13	-1.97	0.255	-1.33	0.264	-1.32	0.22	-1.16	0.212	-1.38	0.158
mmu-miR-181b-5p	-1.17	0.763	-1.08	0.726	1.00	0.835	-1.26	0.618	-1.06	0.77	1.15	0.784	-1.14	0.892	-1.19	0.57	-1.15	0.474	-1.46	0.144	-1.46	0.131	-2.27	0.021
mmu-miR-181c-5p	-1.01	0.960	-1.55	0.125	-1.28	0.254	-1.01	0.977	-1.1	0.498	1.00	0.87	-1.26	0.393	-1.16	0.516	-1.15	0.465	-1.47	0.127	-1.28	0.034	-1.72	0.004
mmu-miR-181d-5p	-1.17	0.820	-1.27	0.485	-1.11	0.66	-1.27	0.55	-1.06	0.721	1.12	0.933	1.04	0.891	-1.07	0.858	-1.08	0.796	-1.42	0.183	-1.3	0.388	-1.92	0.013
mmu-miR-182-5p	2.10	0.256	-1.46	0.399	-2.09	0.196	-2.71	0.099	-18.47	0.112	-2.97	0.305	-1.03	0.494	-1.44	0.643	-1.67	0.265	1.03	0.808	-1.16	0.521	-1.71	0.355
mmu-miR-186-5p	-1.01	0.977	-1.38	0.051	-1.39	0.122	-1.03	0.923	-1.07	0.453	-1.28	0.172	-1.27	0.301	-1.19	0.396	-1.4	0.204	-1.65	0.085	-1.52	0.121	-1.82	0.056
mmu-miR-195a-5p	-1.03	0.833	-1.08	0.498	-1.24	0.104	-1.06	0.543	-1.02	0.796	-1.04	0.634	-1.39	0.194	-1.18	0.411	-1.36	0.21	-1.33	0.112	-1.15	0.019	-1.15	0.018
mmu-miR-19a-3p	-1.16	0.606	-1.91	0.088	-2.15	0.022	-1.66	0.102	-2.04	0.033	-2.73	0.027	1.00	0.869	-1.05	0.729	-1.36	0.324	-1.56	0.091	-1.24	0.11	-1.58	0.015
mmu-miR-19b-3p	-1.01	0.613	-1.61	0.17	-1.86	0.094	-1.21	0.397	-1.51	0.172	-2.1	0.109	-1.35	0.289	-1.25	0.449	-1.35	0.335	-1.18	0.261	-1.46	0.001	-1.46	0.001
mmu-miR-200c-3p	-1.01	0.902	-1.05	0.742	-1.06	0.783	-1.14	0.525	-1.04	0.709	1.07	0.974	-1.15	0.601	-1.12	0.724	-1.18	0.527	-1.16	0.427	-1.17	0.194	-1.34	0.091
mmu-miR-20a-5p	1.05	0.834	-1.33	0.303	-1.51	0.131	1.00	0.883	-1.09	0.652	-1.39	0.2	-1.18	0.378	-1.11	0.568	-1.12	0.522	-1.15	0.2	-1.26	0.008	-1.54	0.001
mmu-miR-20b-5p	-1.12	0.691	-1.63	0.249	-1.85	0.13	-1.22	0.417	-1.51	0.328	-1.72	0.169	-1.14	0.584	-1.01	0.901	-1.35	0.259	-1.25	0.204	-1.36	0.061	-1.49	0.051
mmu-miR-221-3p	1.03	0.756	-2.29	0.002	-3.33	0	-1.23	0.128	-1.83	0.008	-2.57	0.004	1.48	0.972	-1.06	0.531	-1.76	0.317	-1.03	0.976	-1.1	0.293	-1.29	0.072
mmu-miR-222-3p	-1.21	0.459	-1.07	0.82	-1.16	0.753	-1.18	0.425	-1.13	0.482	-1.12	0.588	-1.03	0.884	1.1	0.768	-1.1	0.901	-1.29	0.379	-1.05	0.775	-1.33	0.2
mmu-miR-23a-3p	1.01	0.949	1.02	0.863	-1.16	0.113	-1.02	0.77	1.01	0.915	1.02	0.871	-1.2	0.353	-1.01	0.818	-1.19	0.391	-1.08	0.67	1.08	0.516	-1.03	0.893
mmu-miR-23b-3p	1.11	0.326	1.13	0.187	1.03	0.73	1.1	0.418	1.12	0.2	1.2	0.045	-1.21	0.382	-1.05	0.751	-1.33	0.353	-1.35	0.114	-1.01	0.922	-1.11	0.335
mmu-miR-26a-5p	-1.04	0.68	1.13	0.475	1.17	0.11	1.09	0.351	1.13	0.329	1.09	0.424	-1.82	0.077	-1.46	0.154	-1.39	0.189	-1.14	0.372	1.07	0.619	1.16	0.244
mmu-miR-26b-5p	-1.22	0.061	-1.08	0.475	-1.1	0.402	-1.27	0.033	-1.35	0.016	-1.3	0.098	-1.88	0.114	-1.27	0.335	-1.45	0.211	-1.49	0.339	-1.23	0.468	-1.04	0.688
mmu-miR-27a-3p	-1.03	0.735	-1.06	0.46	-1.06	0.486	-1.07	0.325	1.01	0.768	-1	0.93	-1.38	0.155	-1.16	0.434	-1.3	0.231	-1.59	0.012	1.04	0.363	-1.11	0.257
mmu-miR-27b-3p	-1.01	0.862	-1.41	0.001	-1.45	0.006	-1.02	0.875	-1.28	0.076	-1.21	0.182	-1.1	0.58	-1.15	0.509	-1.42	0.297	-1.26	0.047	-1.05	0.472	-1.2	0.054
mmu-miR-291a-3p	1.4	0.787	-1.28	0.404	-1.97	0.228	1.45	0.711	-1.13	0.612	1.09	0.831	1.62	0.28	-1.03	0.686	-1.69	0.199	1.37	0.454	1.63	0.224	1.06	0.952
mmu-miR-294-3p	7.81	0.01	3.17	0.004	2.89	0.021	4.58	0.0001	4.85	0.004	6.32	0.102	2.53	0.117	1.53	0.049	1.45	0.234	4.3	0.026	1.91	0.004	2.38	0.012
mmu-miR-295-3p	-1.79	0.092	-3.39	0.025	1.05	0.959	-3.08	0.031	-1.56	0.303	14.12	0.286	1.1	0.701	1.14	0.58	1.1	0.666	3.67	0.374	-1.06	0.653	-1.11	0.568
mmu-miR-29a-3p	-1.07	0.056	-1.41	0.056	-1.48	0.045	-1.08	0.019	-1.15	0.024	-1.15	0.214	-1.43	0.084	-1.16	0.322	-1.26	0.183	1.24	0.504	1.08	0.495	1.1	0.41
mmu-miR-29b-3p	1.07	0.197	-1.21	0.178	-1.12	0.918	-1.22	0.593	-1.3	0.108	-1.16	0.798	-1.11	0.439	-1.16	0.331	-1.28	0.296	-2.14	0.016	1.04	0.616	1.14	0.376
mmu-miR-29c-3p	1.01	0.921	-1.1	0.141	-1.35	0.24	1.09	0.227	-1.09	0.177	-1.07	0.606	-1.3	0.164	-1.05	0.674	-1.17	0.319	-1.59	0.01	-1.08	0.138	-1.02	0.895
mmu-miR-301a-3p	1.07	0.842	-1.68	0.337	-2.34	0.069	1.1	0.631	-1.38	0.304	-2.23	0.138	-1.05	0.636	-1.12	0.608	-1.53	0.306	-1.46	0.159	-1.17	0.24	-1.49	0.038
mmu-miR-301b-3p	-1.22	0.816	-1.86	0.266	-2.51	0.065	-1.45	0.45	-1.74	0.168	-2.33	0.075	1.14	0.982	-1.06	0.625	-1.51	0.343	-1.51	0.22	-1.41	0.037	-1.49	0.009
mmu-miR-302b-3p	1.05	0.942	1.18	0.553	-1.01	0.986	-1.11	0.647	1.06	0.896	1.17	0.581	1.1	0.701	1.04	0.921	-1.01	0.953	1.38	0.242	1.2	0.368	1.02	0.859
mmu-miR-302d-3p	1.46	0.308	-1.06	0.749	1.12	0.859	1.23	0.529	1.25	0.547	-1.02	0.982	1.29	0.268	1	0.764	-1.3	0.254	1.09	0.733	-1.1	0.637	1.41	0.42
mmu-miR-30a-5p	-1.53	0.304	-1.6	0.007	-1.79	0.004	-2	0.058	-2.14	0.001	-2.03	0.002	-1.47	0.18	-1.14	0.645	-1.29	0.286	-1.11	0.653	1.03	0.954	1.03	0.899
mmu-miR-30b-5p	1.11	0.039	1.05	0.061	1.16	0.208	-1.01	0.836	-1.07	0.097	1.01	0.864	-1.48	0.159	-1.13	0.526	-1.28	0.288	-1.18	0.139	1.01	0.956	1.12	0.256
mmu-miR-30c-5p	-1.11	0.268	1.02	0.744	-1.08	0.268	1.12	0.345	-1.01	0.827	-1.02	0.755	-1.62	0.078	-1.21	0.316	-1.27	0.264	-1.18	0.107	-1.04	0.616	-1.02	0.883
mmu-miR-30d-5p	1	0.997	1.08	0.17	-1.02	0.745	-1.08	0.215	-1.02	0.77	-1.07	0.39	-1.38	0.241	-1.16	0.491	-1.28	0.344	-1.03	0.757	1.14	0.55	1.13	0.599
mmu-miR-30e-5p	1.14	0.218	1.02	0.853	-1.05	0.805	1.09	0.365	-1.02	0.821	1.02	0.845	-1.33	0.325	-1.1	0.58	-1.3	0.351	-1.26	0.161	-1.02	0.759	-1.1	0.922
mmu-miR-322-5p	-1.08	0.444	-1.06	0.153	-1.14	0.113	-1.04	0.367	-1.09	0.103	-1.23	0.004	-1.25	0.314	-1.05	0.699	-1.26	0.254	-1.27	0.138	-1.04	0.685	-1.08	0.353
mmu-miR-325-3p	1.51	0.343	1.14	0.682	-1.4	0.371	1.15	0.832	-1.02	0.912	1.32	0.561	1.1	0.701	1.25	0.427	-1.01	0.953	1.38	0.242	1.2	0.368	1.02	0.859
mmu-miR-338-5p	-1.08	0.575	1.18	0.22	1.15	0.429	-1.17	0.47	1.01	0.986	1.3	0.048	-2.08	0.124	-1.29	0.37	-1.46	0.242	1.08	0.713	1.05	0.824	-1.18	0.457
mmu-miR-340-5p	-1.17	0.104	-1.51	0.001	-1.64	0.02	-1.48	0.004	-1.63	0.001	-2.29	0.0001	-1.23	0.4	-1.05	0.674	-1.44	0.2	-1.67	0.004	-1.4	0.011	-1.32	0.012
mmu-miR-350-3p	1.04	0.677	-1.09	0.021	-1.09	0.007	1.08	0.282	-1.02	0.932	-1.01	0.962	-1.21	0.505	-1.04	0.733	-1.27	0.222	-1.07	0.745	1.04	0.89	1.00	0.946
mmu-miR-369-3p	3.62	0.132	6.05	0.036	3	0.292	5.94	0.038	5.2	0.034	3.87	0.114	-1.15	0.981	-1.64	0.581	1.05	0.889	-1.58	0.232	1.48	0.179	1.14	0.59
mmu-miR-384-5p	-1.67	0.163	-1.5	0.191	-1.27	0.544	-1.71	0.108	-1.6	0.177	-1.3	0.405	1.1	0.701	1.04	0.921	-1.01	0.953	1.28	0.465	1.37	0.454	1.39	0.375
mmu-miR-410-3p	1.53	0.346	1.1	0.869	1.07	0.916	2.13	0.07	1.73	0.167	1.28	0.657	-1.02	0.953	-1.16	0.953	-1.84	0.13	-1.14	0.601	-1.23	0.428	-2.42	0.308
mmu-miR-429-3p	2.87	0.273	-1.05	0.641	1.02	0.925	1.07	0.662	1.06	0.698	1.07	0.688	-1.29	0.315	-1.15	0.527	-1.29	0.394	1.62	0.061	1.02	0.908	1.16	0.471
mmu-miR-466d-3p	10.36	0.285	1.18	0.584	1.19	0.565	-1.23	0.438	-2.56	0.315	-1.1	0.797	-1.63	0.041	-1.34	0.21	-1.22	0.447	-1.06	0.978	1.14	0.246	-1.08	0.474
mmu-miR-466k	1.24	0.265	-1.09	0.889	1.46	0.344	-1.04	0.876	-1.12	0.667	-1.45	0.319	1.35	0.28	1.13	0.655	1.1	0.676	2.47	0.374	1.25	0.192	1.08	0.659
mmu-miR-495-3p	2.44	0.038	1.48	0.193	1.2	0.397	2.02	0.009	1.5	0.035	3.57	0.0001	-2.56	0.004	-2.15	0.003	-1.18	0.206	1.76	0.132	1.45	0.366	1.16	0.324
mmu-miR-497a-5p	1.33	0.008	-1.74	0.007	-1.52	0.308	1.37	0.106	1.22	0.032	-1.11	0.833	-1.27	0.379	-1.53	0.187	-1.44	0.212	-1.29	0.232	1.06	0.674	1.08	0.488
mmu-miR-568	1.14	0.613	1.52	0.422	-1.58	0.458	1.19	0.863	-1.35	0.69	-1.04	0.631	1.26	0.358	8.79	0.285	-1.01	0.953	1.53	0.095	1.2	0.368	1.02	0.859
mmu-miR-590-3p	1.05	0.942	1.18	0.553	-1.01	0.986	-1.11	0.647	1.06	0.896	1.17	0.581	1.1	0.701	1.04	0.921	-1.01	0.953	1.38	0.242	1.2	0.368	1.02	0.859
mmu-miR-669h-3p	2.25	0.073	1.64	0.317	1.46	0.516	2.35	0.037	2.41	0.059	2.96	0.03	1.05	0.58	1.19	0.239	-1.29	0.141	1.83	0.159	1.44	0.097	1.23	0.169
mmu-miR-669k-3p	1.1	0.882	1	0.9	-1.07	0.773	-1.22	0.52	-1.03	0.752	1.08	0.988	1.1	0.701	1.08	0.766	-1.01	0.953	1.2	0.616	-1.23	0.504	1.81	0.379
mmu-miR-694	-1.08	0.701	1.65	0.322	-1.33	0.364	1.02	0.911	1.05	0.838	-1	0.992	1.18	0.751	-1.28	0.713	-1.58	0.258	-1.92	0.327	-1.21	0.833	-2.1	0.14
mmu-miR-712-5p	1.07	0.697	1.09	0.622	1.7	0.026	1.71	0.139	1.99	0.008	2.78	0.049	-1.62	0.006	-1.29	0.075	-1.07	0.406	-1.5	0.196	-1.47	0.061	-2.8	0.003
mmu-miR-721	3.33	0.001	1.71	0.002	7.63	0.277	6.07	0.007	4.63	0.015	3.94	0.089	2.14	0.034	1.93	0.053	-1.03	0.916	1.72	0.065	9.62	0.005	10.56	0.094
mmu-miR-743a-3p	1.65	0.254	1.13	0.82	-1.04	0.7	1.97	0.091	1.62	0.258	2.03	0.117	1.1	0.701	1.29	0.24	-1.01	0.953	1.78	0.272	-1.02	0.804	1.15	0.702
mmu-miR-743b-3p	1.15	0.617	1.26	0.435	1.05	0.882	1.1	0.661	3.86	0.281	1.9	0.165	1.1	0.701	1.04	0.921	-1.01	0.953	1.38	0.242	1.2	0.368	1.02	0.859
mmu-miR-876-3p	1.05	0.942	1.18	0.553	-1.01	0.986	-1.11	0.647	1.06	0.896	1.17	0.581	1.1	0.701	1.04	0.921	-1.01	0.953	1.38	0.242	1.2	0.368	1.02	0.859
mmu-miR-9-5p	-1.46	0.126	-1.2	0.73	-1.02	0.793	2.1	0.001	1.76	0.118	2.01	0.055	-2.51	0.012	-2.27	0.03	-2.1	0.093	-1.51	0.121	-1.16	0.565	1.31	0.152
mmu-miR-93-5p	-1.01	0.989	-1.35	0.177	-1.36	0.11	1.03	0.815	-1.15	0.288	-1.32	0.186	-1.09	0.595	1.01	0.875	-1.21	0.46	1.03	0.739	-1.33	0.003	-1.45	0.005
mmu-miR-98-5p	-1.2	0.058	-1.22	0.435	-1.16	0.016	-1.28	0.045	-1.11	0.248	-1	0.93	-1.36	0.406	-2.46	0.125	-1.72	0.173	-1.55	0.223	-1.02	0.773	-1.09	0.745
